# Supplementary material for: Coastal and Marine Socio-Ecological Systems: A Systematic Review of the Literature
Source: Frontiers journal article supplement (doi:10.3389/fmars.2021.648006), 2021-04-23
Supplement: Table_1.docx [file Table_1.docx]

Supplementary Material

# Supplementary Table

**Table S1.** List of studies reviewed

| Authors | Year | Title |
| --- | --- | --- |
| Ban N.C., Whitney C., Davies T.E., Buscher E., Lancaster D., Eckert L., Rhodes C., Jacob A.L. | 2017 | Conservation Actions at Global and Local Scales in Marine Social-Ecological Systems: Status, Gaps, and Ways Forward |
| Barclay Frey J., Berkes F. | 2014 | Can partnerships and community-based conservation reverse the decline of coral reef social-ecological systems? |
| Barnett, Allain J.; Anderies, John M. | 2014 | Weak feedbacks, governance mismatches, and the robustness of social-ecological systems: an analysis of the Southwest Nova Scotia lobster fishery with comparison to Maine |
| Begossi A., Salyvonchyk S., Nora V., Lopes P.F., Silvano R.A.M. | 2012 | The paraty artisanal fishery (southeastern Brazilian coast): ethnoecology and management of a social-ecological system (SES) |
| Benham C.F. | 2017 | Aligning public participation with local environmental knowledge in complex marine social-ecological systems |
| Berkes F. | 2011 | Restoring Unity: The Concept of Marine Social-Ecological Systems |
| Berkes, Fikret; Seixas, Cristiana S. | 2005 | Building resilience in lagoon social-ecological systems: A local-level perspective |
| Bigagli E. | 2015 | The EU legal framework for the management of marine complex social-ecological systems |
| Bigagli E. | 2016 | The international legal framework for the management of the global oceans social-ecological system |
| Broderstad, Else Grete; Eythorsson, Einar | 2014 | Resilient communities? Collapse and recovery of a social-ecological system in Arctic Norway |
| Burbano, Diana V.; Mena, Carlos F.; Guarderas, Paulina; Vinueza, Luis; Reck, Guenther | 2014 | Shifting Baselines in the Galapagos White Fin Fishery, Using Fisher’s Anecdotes to Reassess Fisheries Management: The Case of the Galapagos Grouper |
| Burkhard, Benjamin; Gee, Kira | 2012 | Establishing the Resilience of a Coastal-marine Social-ecological System to the Installation of Offshore Wind Farms |
| Chalcobsky B.A., Crespo E.A., Coscarella M.A. | 2017 | Whale-watching in Patagonia: What regulation scheme should be implemented when the socio-ecological system is changing? |
| Chang, Chung-Te; Vadeboncoeur, Matthew A.; Lin, Teng-Chiu | 2018 | Resistance and resilience of social-ecological systems to recurrent typhoon disturbance on a subtropical island: Taiwan |
| Chapin F.S.III, Robards M.D., Johnstone J.F., Lantz T.C., Kokelj S.V. | 2013 | Case Study: Novel Socio-Ecological Systems in the North: Potential Pathways Toward Ecological and Societal Resilience |
| Charles A. | 2012 | People, oceans, and scale: Governance, livelihoods, and climate change adaptation in marine social-ecological systems |
| Cinner, Joshua E.; McClanahan, Tim R.; MacNeil, M. Aaron; Graham, Nicholas A. J.; Daw, Tim M.; Mukminin, Ahmad; Feary, David A.; Rabearisoa, Ando L.; Wamukota, Andrew; Jiddawi, Narriman; Campbell, Stuart J.; Baird, Andrew H.; Januchowski-Hartley, Fraser A.; Hamed, Salum; Lahari, Rachael; Morove, Tau; Kuange, John | 2012 | Comanagement of coral reef social-ecological systems |
| Crépin, Anne-Sophie; Gren, Asa; Engstrom, Gustav; Ospina, Daniel | 2017 | Operationalising a social-ecological system perspective on the Arctic Ocean |
| Cullen-Unsworth, Leanne C.; Nordlund, Lina Mtwana; Paddock, Jessica; Baker, Susan; McKenzie, Len J.; Unsworth, Richard K. F. | 2014 | Seagrass meadows globally as a coupled social-ecological system: Implications for human wellbeing |
| D’Anna, Linda M.; Murray, Grant D. | 2015 | Perceptions of shellfish aquaculture in British Columbia and implications for well-being in marine social-ecological systems |
| Daoud, Ibrahim; Oman, Mona Abd-El-Zaher; Alary, Veronique; Moselhy, Naeem; Salal, Ehab; Naga, Adel Aboul; Salama, Omar; Duarte, Laura G.; Tourrand, Jean Francois | 2016 | Adaptation and Resilience in Pastoral Management of the Mediterranean Bedouin Social-Ecological System in the Northwestern Coastal Zone of Egypt |
| Davies, Neil; Field, Dawn; Gavaghan, David; Holbrook, Sally J.; Planes, Serge; Troyer, Matthias; Bonsall, Michael; Claudet, Joachim; Roderick, George; Schmitt, Russell J.; Zettler, Linda Amaral; Berteaux, Veronique; Bossin, Herve C.; Cabasse, Charlotte; Collin, Antoine; Deck, John; Dell, Tony; Dunne, Jennifer; Gates, Ruth; Harfoot, Mike; Hench, James L.; Hopuare, Marania; Kirch, Patrick; Kotoulas, Georgios; Kosenkov, Alex; Kusenko, Alex; Leichter, James J.; Lenihan, Hunter; Magoulas, Antonios; Martinez, Neo; Meyer, Chris; Stoll, Benoit; Swalla, Billie; Tartakovsky, Daniel M.; Murphy, Hinano Teavai; Turyshev, Slava; Valdvinos, Fernanda; Williams, Rich; Wood, Spencer | 2016 | Simulating social-ecological systems: The Island Digital Ecosystem Avatars (IDEA) consortium |
| de Andrés M., Barragán J.M., García Sanabria J. | 2018 | Ecosystem services and urban development in coastal Social-Ecological Systems: The Bay of Cádiz case study |
| Denkinger, Judith; Quiroga, Diego; Carlos Murillo, Juan | 2014 | Assessing Human-Wildlife Conflicts and Benefits of Galapagos Sea Lions on San Cristobal Island, Galapagos |
| Engie, Kim; Quiroga, Diego | 2014 | The Emergence of Recreational Fishing in the Galapagos Marine Reserve: Adaptation and Complexities |
| Faulkner L., Brown K., Quinn T. | 2018 | Analyzing community resilience as an emergent property of dynamic social-ecological systems |
| Ferrol-Schulte D., Wolff M., Ferse S., Glaser M. | 2013 | Sustainable Livelihoods Approach in tropical coastal and marine social-ecological systems: A review |
| Fleischman F.D., Ban N.C., Evans L.S., Ban N.C., Evans L.S., Epstein G., Villamayor-Tomas S., Garcia-Lopez G., Villamayor-Tomas S. | 2014 | Governing large-scale social-ecological systems: Lessons from five cases |
| Forbes, Bruce C. | 2013 | Cultural Resilience of Social-ecological Systems in the Nenets and Yamal-Nenets Autonomous Okrugs, Russia: A Focus on Reindeer Nomads of the Tundra |
| Fuller, Emma C.; Samhouri, Jameal F.; Stoll, Joshua S.; Levin, Simon A.; Watson, James R. | 2017 | Characterizing fisheries connectivity in marine social-ecological systems |
| Gari S.R., Newton A., Icely J.D. | 2015 | A review of the application and evolution of the DPSIR framework with an emphasis on coastal social-ecological systems |
| Glaeser B. | 2016 | From global sustainability research matrix to typology: a tool to analyze coastal and marine social-ecological systems |
| Glaser M., Christie P., Diele K., Dsikowitzky L., Ferse S., Nordhaus I., Schlüter A., Schwerdtner Mañez K., Wild C. | 2012 | Measuring and understanding sustainability-enhancing processes in tropical coastal and marine social-ecological systems |
| Glaser M., Glaeser B. | 2014 | Towards a framework for cross-scale and multi-level analysis of coastal and marine social-ecological systems dynamics |
| Glaser, M.; Krause, G.; Oliveira, R. S.; Fontalvo-Herazo, M. | 2010 | Mangroves and People: A Social-Ecological System |
| González, Jose A.; Montes, Carlos; Rodriguez, Jose; Tapia, Washington | 2008 | Rethinking the Galapagos Islands as a Complex Social-Ecological System: Implications for Conservation and Management |
| Gordon, Iain J. | 2007 | Linking land to ocean: feedbacks in the management of socio-ecological systems in the Great Barrier Reef catchments |
| Guillotreau, Patrice; Allison, Edward H.; Bundy, Alida; Cooley, Sarah R.; Defeo, Omar; Le Bihan, Veronique; Pardo, Sophie; Perry, R. Ian; Santopietro, George; Seki, Tetsuo | 2017 | A comparative appraisal of the resilience of marine social-ecological systems to mass mortalities of bivalves |
| Hagenlocher M., Renaud F.G., Haas S., Sebesvari Z. | 2018 | Vulnerability and risk of deltaic social-ecological systems exposed to multiple hazards |
| Hammer, Monica | 2009 | Whose Fish? Managing Salmonids and Humans in Complex Social-Ecological Systems: Examples from the Baltic Sea Region |
| Hossain M.S., Szabo S. | 2017 | Understanding the social-ecological system of wetlands |
| Hu, Mengmeng; Zhang, Junmin; Huang, Jinlou | 2018 | Assessing Social-Ecological System Resilience in Mainland China |
| Ishtiaque, Asif; Sangwan, Nikhil; Yu, David J. | 2017 | Robust-yet-fragile nature of partly engineered social-ecological systems: a case study of coastal Bangladesh |
| Jarre A., Shannon L.J., Cooper R., Duggan G.L., Gammage L.C., Lockerbie E.M., McGregor E.S., Ragaller S.M., Visser N., Ward C., Watermeyer K.E., Weller F.G., Ommer R.E. | 2018 | Untangling a Gordian knot that must not be cut: Social-ecological systems research for management of southern Benguela fisheries |
| Jarre, Astrid; Ragaller, Sven M.; Hutchings, Laurence | 2013 | Long-term, Ecosystem-Scale Changes in the Southern Benguela Marine Pelagic Social-Ecological System: Interaction of Natural and Human Drivers |
| Kaplan-Hallam M., Bennett N.J., Satterfield T. | 2017 | Catching sea cucumber fever in coastal communities: Conceptualizing the impacts of shocks versus trends on social-ecological systems |
| Kittinger, John N.; Finkbeiner, Elena M.; Glazier, Edward W.; Crowder, Larry B. | 2012 | Human Dimensions of Coral Reef Social-Ecological Systems |
| Lade, Steven J.; Niiranen, Susa | 2017 | Generalized modeling of empirical social-ecological systems |
| Larsen R.K., Calgaro E., Thomalla F. | 2011 | Governing resilience building in Thailand's tourism-dependent coastal communities: Conceptualising stakeholder agency in social-ecological systems |
| Lazarus E.D. | 2014 | Threshold effects of hazard mitigation in coastal human-environmental systems |
| Lebel, Louis; Anderies, John M.; Campbell, Bruce; Folke, Carl; Hatfield-Dodds, Steve; Hughes, Terry P.; Wilson, James | 2006 | Governance and the capacity to manage resilience in regional social-ecological systems |
| Leslie, Heather M.; Basurto, Xavier; Nenadovic, Mateja; Sievanen, Leila; Cavanaugh, Kyle C.; Jose Cota-Nieto, Juan; Erisman, Brad E.; Finkbeiner, Elena; Hinojosa-Arango, Gustavo; Moreno-Baez, Marcia; Nagavarapu, Sriniketh; Reddy, Sheila M. W.; Sanchez-Rodriguez, Alexandra; Siegel, Katherine; Juan Ulibarria-Valenzuela, Jose; Hudson Weaver, Amy; Aburto-Oropeza, Octavio | 2015 | Operationalizing the social-ecological systems framework to assess sustainability |
| Leslie, Heather M.; Schlueter, Maja; Cudney-Bueno, Richard; Levin, Simon A. | 2009 | Modeling responses of coupled social-ecological systems of the Gulf of California to anthropogenic and natural perturbations |
| Levin P.S., Breslow S.J., Harvey C.J., Norman K.C., Poe M.R., Williams G.D., Plummer M.L. | 2016 | Conceptualization of Social-Ecological Systems of the California Current: An Examination of Interdisciplinary Science Supporting Ecosystem-Based Management |
| Levin, Phillip S.; Francis, Tessa B.; Taylor, Nathan G. | 2016 | Thirty-two essential questions for understanding the social-ecological system of forage fish: the case of Pacific Herring |
| Levin, Phillip S.; Williams, Gregory D.; Rehr, Amanda; Norman, Karma C.; Harvey, Chris J. | 2015 | Developing conservation targets in social-ecological systems |
| Li Y., Kappas M., Li Y. | 2018 | Exploring the coastal urban resilience and transformation of coupled human-environment systems |
| London S., Rojas M.L., Martin M.M.I., Scordo F., Cisneros M.A.H., Bustos M.L., Perillo G.M.E., Piccolo M.C. | 2017 | Characterization of an artisanal fishery in Argentina using the social-ecological systems framework |
| López-Angarita, Juliana; Moreno-Sanchez, Rocio; Higinio Maldonado, Jorge; Sanchez, Juan A. | 2014 | Evaluating Linked Social-Ecological Systems in Marine Protected Areas |
| Loring, Philip A. | 2016 | Toward a Theory of Coexistence in Shared Social-Ecological Systems: The Case of Cook Inlet Salmon Fisheries |
| Lozoya J.P., Conde D., Asmus M., Polette M., Píriz C., Martins F., De Álava D., Marenzi R., Nin M., Anello L., Moraes A., Zaguini M., Marrero L., Verrastro N., Lagos X., Chreties C., Rodriguez L. | 2015 | Linking social perception and risk analysis to assess vulnerability of coastal socio-ecological systems to climate change in Atlantic South America |
| Manuel-Navarrete D., Gómez J.J., Gallopín G. | 2007 | Syndromes of sustainability of development for assessing the vulnerability of coupled human-environmental systems. The case of hydrometeorological disasters in Central America and the Caribbean |
| Marín, Andres; Gelcich, Stefan; Carlos Castilla, Juan | 2014 | Ecosystem Services and Abrupt Transformations in a Coastal Wetland Social-Ecological System: Tubul-Raqui after the 2010 Earthquake in Chile |
| Martone, Rebecca G.; Bodini, Antonio; Micheli, Fiorenza | 2017 | Identifying potential consequences of natural perturbations and management decisions on a coastal fishery social-ecological system using qualitative loop analysis |
| Mauerhofer V., Ichinose T., Blackwell B.D., Willig M.R., Flint C.G., Krause M.S., Penker M. | 2018 | Underuse of social-ecological systems: A research agenda for addressing challenges to biocultural diversity |
| McClanahan, Timothy R.; Castilla, Juan Carlos; White, Alan T.; Defeo, Omar | 2009 | Healing small-scale fisheries by facilitating complex socio-ecological systems |
| Mee, Laurence; Cooper, Philip; Kannen, Andreas; Gilbert, Alison J.; O’Higgins, Tim | 2015 | Sustaining Europe’s seas as coupled social-ecological systems |
| Melbourne-Thomas, Jessica; Constable, Andrew J.; Fulton, Elizabeth A.; Corney, Stuart P.; Trebilco, Rowan; Hobday, Alistair J.; Blanchard, Julia L.; Boschetti, Fabio; Bustamante, Rodrigo H.; Cropp, Roger; Everett, Jason D.; Fleming, Aysha; Galton-Fenzi, Ben; Goldsworthy, Simon D.; Lenton, Andrew; Lara-Lopez, Ana; Little, Rich; Marzloff, Martin P.; Matear, Richard; Mongin, Mathieu; Plaganyi, Eva; Proctor, Roger; Risbey, James S.; Robson, Barbara J.; Smith, David C.; Sumner, Michael D.; van Putten, E. Ingrid | 2017 | Integrated modelling to support decision-making for marine social-ecological systems in Australia |
| Metcalf, Sarah J.; van Putten, Elizabeth I.; Frusher, Stewart; Marshall, Nadine A.; Tull, Malcolm; Caputi, Nick; Haward, Marcus; Hobday, Alistair J.; Holbrook, Neil J.; Jennings, Sarah M.; Pecl, Gretta T.; Shaw, Jenny | 2015 | Measuring the vulnerability of marine social-ecological systems: a prerequisite for the identification of climate change adaptations |
| Murphy D.W.A. | 2015 | Theorizing climate change, (im)mobility and socio-ecological systems resilience in low-elevation coastal zones |
| Murray G., D’Anna L. | 2015 | Seeing shellfish from the seashore: The importance of values and place in perceptions of aquaculture and marine social-ecological system interactions |
| Murray G., D’Anna L., MacDonald P. | 2016 | Measuring what we value: The utility of mixed methods approaches for incorporating values into marine social-ecological system management |
| Murray G., Neis B., Schneider D.C., Ings D., Gosse K., Whalen J., Palmer C.T. | 2008 | Opening the black box: Methods, procedures, and challenges in the historical reconstruction of marine social-ecological systems |
| Partelow S., Boda C. | 2015 | A modified diagnostic social-ecological system framework for lobster fisheries: Case implementation and sustainability assessment in Southern California |
| Peña-Alonso C., Ariza E., Hernández-Calvento L., Pérez-Chacón E. | 2018 | Exploring multi-dimensional recreational quality of beach socio-ecological systems in the Canary Islands (Spain) |
| Perry R.I., Masson D. | 2013 | An integrated analysis of the marine social-ecological system of the strait of Georgia, Canada, over the past four decades, and development of a regime shift index |
| Perry R.I., Ommer R.E., Barange M., Werner F. | 2010 | The challenge of adapting marine social-ecological systems to the additional stress of climate change |
| Pollnac, Richard; Christie, Patrick; Cinner, Joshua E.; Dalton, Tracey; Daw, Tim M.; Forrester, Graham E.; Graham, Nicholas A. J.; McClanahan, Timothy R. | 2010 | Marine reserves as linked social-ecological systems |
| Quinn C.H., Stringer L.C., Berman R.J., Le H.T.V., Msuya F.E., Pezzuti J.C.B., Orchard S.E. | 2017 | Unpacking changes in mangrove social-ecological systems: Lessons from Brazil, Zanzibar, and Vietnam |
| Reenberg, Anette; Birch-Thomsen, Torben; Mertz, Ole; Fog, Bjarne; Christiansen, Sofus | 2008 | Adaptation of Human Coping Strategies in a Small Island Society in the SW Pacific-50 Years of Change in the Coupled Human-Environment System on Bellona, Solomon Islands |
| Renaud F.G., Birkmann J., Damm M., Gallopín G.C. | 2010 | Understanding multiple thresholds of coupled social-ecological systems exposed to natural hazards as external shocks |
| Roebeling P., Alves H., Rocha J., Brito A., Almeida P., Mamede J. | 2014 | Gains from trans-boundary water quality management in linked catchment and coastal socio-ecological systems: A case study for the Minho region |
| Rothenberger, Megan; Armstrong, Andrea; Spitz, Mia | 2018 | Social-ecological system responses to Hurricane Sandy in the Hudson-Raritan Estuary |
| Schimel D., Hibbard K., Costa D., Cox P., Leeuw S.V.D. | 2015 | Analysis, Integration and Modeling of the Earth System (AIMES): Advancing the post-disciplinary understanding of coupled human-environment dynamics in the Anthropocene |
| Stevenson T.C., Tissot B.N. | 2014 | Current trends in the analysis of co-management arrangements in coral reef ecosystems: A social-ecological systems perspective |
| Sun, Xiang; He, Jia; Shi, Yaqi; Zhu, Xiaodong; Li, Yangfan | 2012 | Spatiotemporal change in land use patterns of coupled human-environment system with an integrated monitoring approach: A case study of Lianyungang, China |
| Tiller R., De Kok J.-L., Vermeiren K., Richards R., Van Ardelan M., Bailey J. | 2016 | Stakeholder perceptions of links between environmental changes to their socio-ecological system and their adaptive capacity in the region of Troms, Norway |
| Trosper, Ronald L. | 2003 | Resilience in pre-contact Pacific Northwest social ecological systems |
| Usseglio, Paolo; Schuhbauer, Anna; Friedlander, Alan | 2014 | Collaborative Approach to Fisheries Management as a Way to Increase the Effectiveness of Future Regulations in the Galapagos Archipelago |
| Van Dolah, Elizabeth R.; Paolisso, Michael; Sellner, Kevin; Place, Allen | 2016 | Employing a socio-ecological systems approach to engage harmful algal bloom stakeholders |
| Van Putten I.E., Dichmont C.M., Dutra L.X.C., Thébaud O., Deng R.A., Jebreen E., Owens R., Pascual R., Read M., Thompson C. | 2016 | Objectives for management of socio-ecological systems in the Great Barrier Reef region, Australia |
| Villamor G.B., Palomo I., Santiago C.A.L., Oteros-Rozas E., Hill J. | 2014 | Assessing stakeholders’ perceptions and values towards social-ecological systems using participatory methods |
| Villasante S. | 2012 | The management of the blue whiting fishery as complex social-ecological system: The Galician case |
| Vinueza, Luis; Post, Annie; Guarderas, Paulina; Smith, Franz; Idrovo, Federico | 2014 | Ecosystem-Based Management for Rocky Shores of the Galapagos Islands |
| Vugteveen P., Rouwette E., Stouten H., van Katwijk M.M., Hanssen L. | 2015 | Developing social-ecological system indicators using group model building |
| Wawo, Mintje | 2017 | Social-Ecological System in Seagrass Ecosystem Management at Kotania Bay Waters, Western Seram, Indonesia |
| Whitney, Charlotte K.; Bennett, Nathan J.; Ban, Natalie C.; Allison, Edward H.; Armitage, Derek; Blythe, Jessica L.; Burt, Jenn M.; Cheung, William; Finkbeiner, Elena M.; Kaplan-Hallam, Maery; Perry, Ian; Turner, Nancy J.; Yumagulova, Lilia | 2017 | Adaptive capacity: from assessment to action in coastal social-ecological systems |
| Zaucha J., Conides A., Klaoudatos D., Norén K. | 2016 | Can the ecosystem services concept help in enhancing the resilience of land-sea social-ecological systems? |
